# Supplementary material for: Design of asymmetric benzodithiophene based wide band-gap conjugated polymers toward efficient polymer solar cells promoted by a low boiling point additive
Source: Royal Society of Chemistry journal article supplement (doi:10.1039/c8tc00148k), 2018-01-01
Supplement: c8tc00148k1.pdf [file c8tc00148k1.pdf]

Electronic Supplementary Material (ESI) for Journal of Materials Chemistry C.

This journal is © The Royal Society of Chemistry 2018

## **Electronic Supplementary information (ESI):**

### **Design of Asymmetric Benzodithiophene based Wide Band-gap Conjugated**

### **Polymers toward Efficient Polymer Solar Cells Promoted by**

### **Low Boiling Point Additive**

Yonghai Li,<sup>‡a</sup> Linrui Duan,<sup>‡a</sup> Deyu Liu,<sup>‡a,d</sup> Weichao Chen,<sup>a,b\*</sup> Xichang Bao,<sup>a</sup> Hongyu Zhen,<sup>c</sup>  
Huizhou Liu<sup>a\*</sup> and Renqiang Yang<sup>a\*</sup>

<sup>a</sup> CAS Key Laboratory of Bio-based Materials, Qingdao Institute of Bioenergy and Bioprocess Technology, Chinese Academy of Sciences, Qingdao 266101, China.

\*E-mail: [liuhz@qibebt.ac.cn](mailto:liuhz@qibebt.ac.cn), [yangrq@qibebt.ac.cn](mailto:yangrq@qibebt.ac.cn).

<sup>b</sup> College of Textiles & Clothing, Qingdao University, Qingdao 266071, China. \*E-mail: [chenwc@qdu.edu.cn](mailto:chenwc@qdu.edu.cn).

<sup>c</sup> College of Chemistry and Materials Science and Engineering, Fujian Key Laboratory of Polymer Materials, Fujian Normal University, Fuzhou 350007, China.

<sup>d</sup> University of Chinese Academy of Sciences, Beijing 100049, China.

<sup>‡</sup> Yonghai Li, Linrui Duan and Deyu Liu contributed equally to this work.

## 1. Materials Characterization Techniques

$^1\text{H}$  NMR and  $^{13}\text{C}$  NMR spectra of intermediates were collected on a Bruker AVANCE-III 600 Spectrometer at 298 K as solutions in  $\text{CDCl}_3$ . Gel permeation chromatography (GPC) was performed with trichlorobenzene (TCB) as eluent at 150 °C and polystyrene was used as the standard. Elemental analysis was performed on a Heraus CHN-Rapid elemental analyzer. TGA measurement was performed using a SDT Q600 V20.9 Build 20 at a heating rate of 10 °C min<sup>-1</sup> under a nitrogen atmosphere. UV-vis absorption spectra were measured from a Hitachi U-4100 spectrophotometer with dilute solutions in *o*-DCB and solid state films of the polymers (or polymer/acceptor blends) at room temperature. Cyclic voltammetry (CV) measurements were performed on a CHI660D electrochemical workstation, equipped with a three-electrode cell consisting of a platinum working electrode, a saturated calomel electrode (SCE) as reference electrode and a platinum wire counter electrode. CV measurements were carried out in anhydrous acetonitrile containing 0.1 M *n*-Bu<sub>4</sub>NPF<sub>6</sub> as a supporting electrolyte under an argon atmosphere at a scan rate of 100 mV s<sup>-1</sup> assuming that the absolute energy level of Fc/Fc<sup>+</sup> was -4.80 eV. Thin films were deposited from *o*-DCB solution onto the working electrodes. Density functional theory (DFT) calculations were confirmed by the Gaussian 09 program at the B3LYP/6-31G(d,p) level. XRD measurements were carried out in reflection mode at room temperature. Atomic force microscopy (AFM) images were obtained using Agilent 5400 scanning probe microscope in tapping-mode with MikroMasch NSC-15 AFM tips. Transmission electron microscopy (TEM) images were obtained by using a HITACHI H-7650 electron microscope with an acceleration voltage of 100kV.

## 2. Device Fabrication and Evaluations

Photovoltaic devices were fabricated with a conventional device structure of ITO/PEDOT:PSS/polymer : acceptor/PFN/Al. The patterned ITO glass (sheet resistance = 15 Ω/square) was pre-cleaned in an ultrasonic bath of acetone and isopropyl alcohol and treated in an ultraviolet-ozone chamber (PREEN II-862) for 6 min. Then a thin layer (about 30 nm) of PEDOT:PSS was spin-coated onto the ITO glass at 4000 rpm and baked at 150 °C for 15 min.

Solutions of polymer/acceptor in *o*-DCB (~12 mg/mL, total concentration) were stirred overnight and warmed to 90 °C for 30 mins before spin-coating on the PEDOT:PSS layer to form the active layer about 100-120 nm. The thickness of the active layer was measured using a Veeco Dektak 150 profilometer. Then PFN solution (in CH<sub>3</sub>OH) was spin-coating as electron transfer layer. Finally, Al (100 nm) metal electrode was thermal evaporated under about 4×10<sup>-4</sup> Pa and the device area was 0.1 cm<sup>2</sup> defined by shadow mask.

The current density–voltage ( $J$ – $V$ ) characteristics were recorded with a Keithley 2400 source measurement unit under simulated 100 mW cm<sup>-2</sup> irradiation from a Newport solar simulator. The external quantum efficiencies (EQEs) were analysed using a certified Newport incident photon conversion efficiency (IPCE) measurement system. The hole mobility and electron mobility were measured by space-charge-limited current (SCLC) method with a device configuration of ITO/PEDOT:PSS/active layer/MoO<sub>3</sub>/Al and ITO/ZnO/active layer/PFN/Al structure, respectively. The SCLC is described by the Mott–Gurney law:

$$J = 9\epsilon\mu V^2/(8L^3)$$

where  $\epsilon$  represents the dielectric constant of the metal, and  $\mu$  is the carrier mobility,  $V$  is the voltage drop across the device and  $L$  is the thickness of the active layer.

### 3. TGA measurments

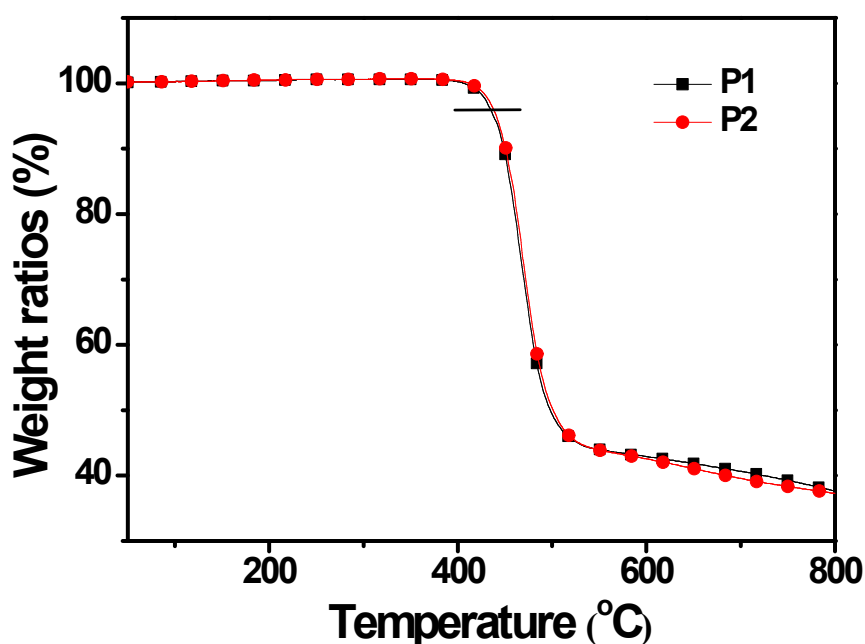

**Fig. S1** TGA curves of P1 and P2 with a heating rate of 10 °C/min in N<sub>2</sub>.

#### 4. Electrochemical properties

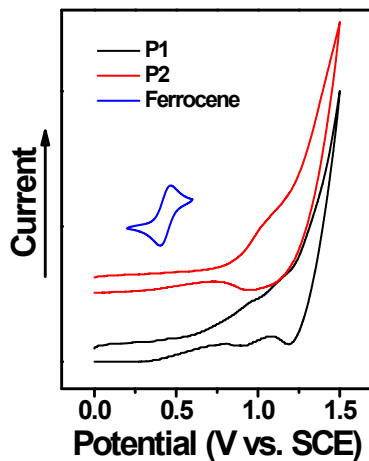

**Fig. S2** Ferrocene calibrated cyclic voltammograms of P1 and P2 on Pt electrodes in 0.1 M Bu<sub>4</sub>NPF<sub>6</sub>-CH<sub>3</sub>CN solution at a scan rate of 100 mV s<sup>-1</sup>.

#### 5. Calculated frontier energy levels

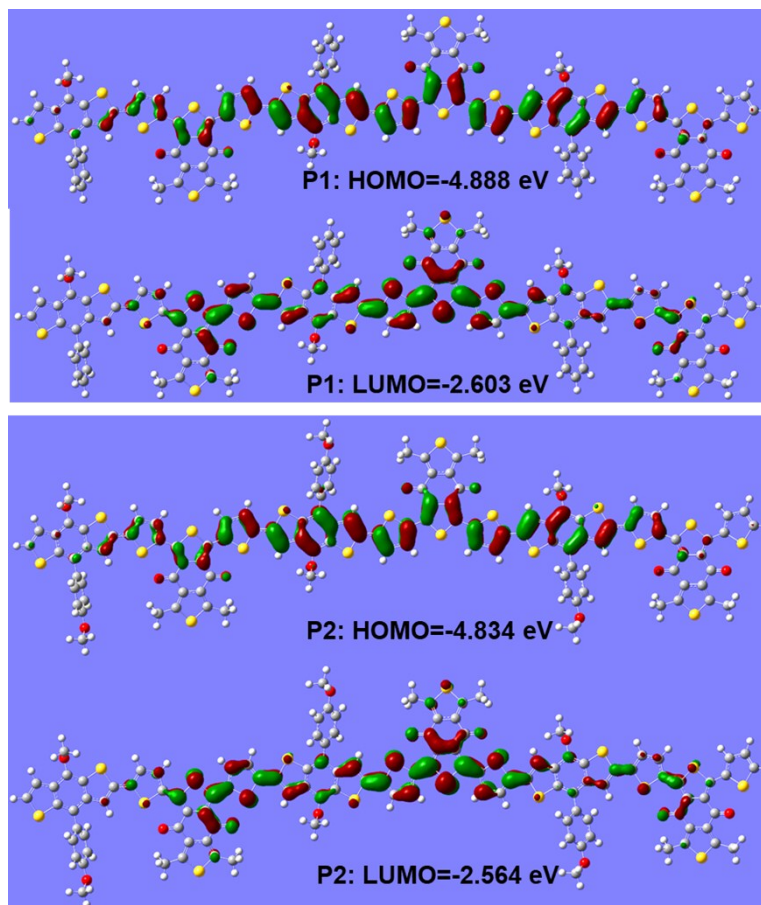

**Fig. S3** The distributions of electron clouds and energy levels values of HOMO/LUMO energy orbitals.

## 6. Photovoltaic properties

**Table S1.** Photovoltaic data of PSCs with different weight ratios and pre-treatment method under the illumination of AM 1.5G at 100 mW cm<sup>-2</sup>

| Blend                  |       | Additive <sup>a</sup> | $V_{OC}$<br>(V) | $J_{SC}$<br>mA cm <sup>-2</sup> | FF<br>(%) | PCE <sup>b</sup><br>(%) |
|------------------------|-------|-----------------------|-----------------|---------------------------------|-----------|-------------------------|
| P1:PC <sub>71</sub> BM | 1.5:1 | -                     | 0.86            | 11.83                           | 58.1      | 5.91 (5.73)             |
|                        | 1:1   | -                     | 0.86            | 12.98                           | 63.1      | 7.04 (6.85)             |
|                        | 1:1.5 | -                     | 0.85            | 11.55                           | 64.5      | 6.36 (6.21)             |
| P2:PC <sub>71</sub> BM | 1.5:1 | -                     | 0.86            | 14.51                           | 57.1      | 7.16 (7.03)             |
|                        | 1:1   | -                     | 0.85            | 15.30                           | 66.0      | 8.58 (8.32)             |
|                        | 1:1.5 | -                     | 0.84            | 15.03                           | 62.2      | 7.87 (7.69)             |
| P1:ITIC                | 1.5:1 | -                     | 0.88            | 12.72                           | 51.4      | 5.82 (5.70)             |
|                        | 1:1   | -                     | 0.88            | 14.01                           | 52.7      | 6.50 (6.33)             |
|                        | 1:1.5 | -                     | 0.88            | 13.27                           | 51.9      | 6.06 (5.88)             |
| P2:ITIC                | 1.5:1 | -                     | 0.89            | 14.46                           | 51.6      | 6.73 (6.52)             |
|                        | 1:1   | -                     | 0.89            | 15.58                           | 55.1      | 7.64 (7.41)             |
|                        | 1:1.5 | -                     | 0.9             | 14.17                           | 56.7      | 7.23 (7.02)             |
| P1:ITIC                | 1:1   | 1% T                  | 0.89            | 13.35                           | 53.4      | 6.34 (6.18)             |
|                        | 1:1   | 3% T                  | 0.90            | 13.81                           | 59.9      | 7.46 (7.30)             |
|                        | 1:1   | 5% T                  | 0.89            | 12.89                           | 56.3      | 6.46 (6.33)             |
|                        | 1:1   | 3%DIO                 | 0.86            | 10.54                           | 43.0      | 3.90 (3.69)             |
|                        | 1:1   | 3%CN                  | 0.87            | 10.65                           | 45.3      | 4.20 (3.98)             |
|                        | 1:1   | 120 °C(10 min)        | 0.87            | 13.85                           | 48.8      | 5.88 (5.62)             |
| P2:ITIC                | 1:1   | 1%DIO                 | 0.89            | 14.24                           | 50.1      | 6.35 (6.07)             |
|                        | 1:1   | 1%CN                  | 0.90            | 13.93                           | 51.2      | 6.42 (6.11)             |
|                        | 1:1   | 1% T                  | 0.89            | 16.03                           | 58.8      | 8.38 (8.19)             |
|                        | 1:1   | 3% T                  | 0.90            | 16.70                           | 60.3      | 9.06 (8.91)             |

|     |      |      |       |      |             |
|-----|------|------|-------|------|-------------|
| 1:1 | 5% T | 0.90 | 16.59 | 58.3 | 8.71 (8.56) |
|-----|------|------|-------|------|-------------|

<sup>a</sup> The additive T represents toluene; <sup>b</sup> PCEs were provided in optimal (average) results based on no less than 10 devices for each case; the thickness of all blend films are  $110 \pm 15$  nm.

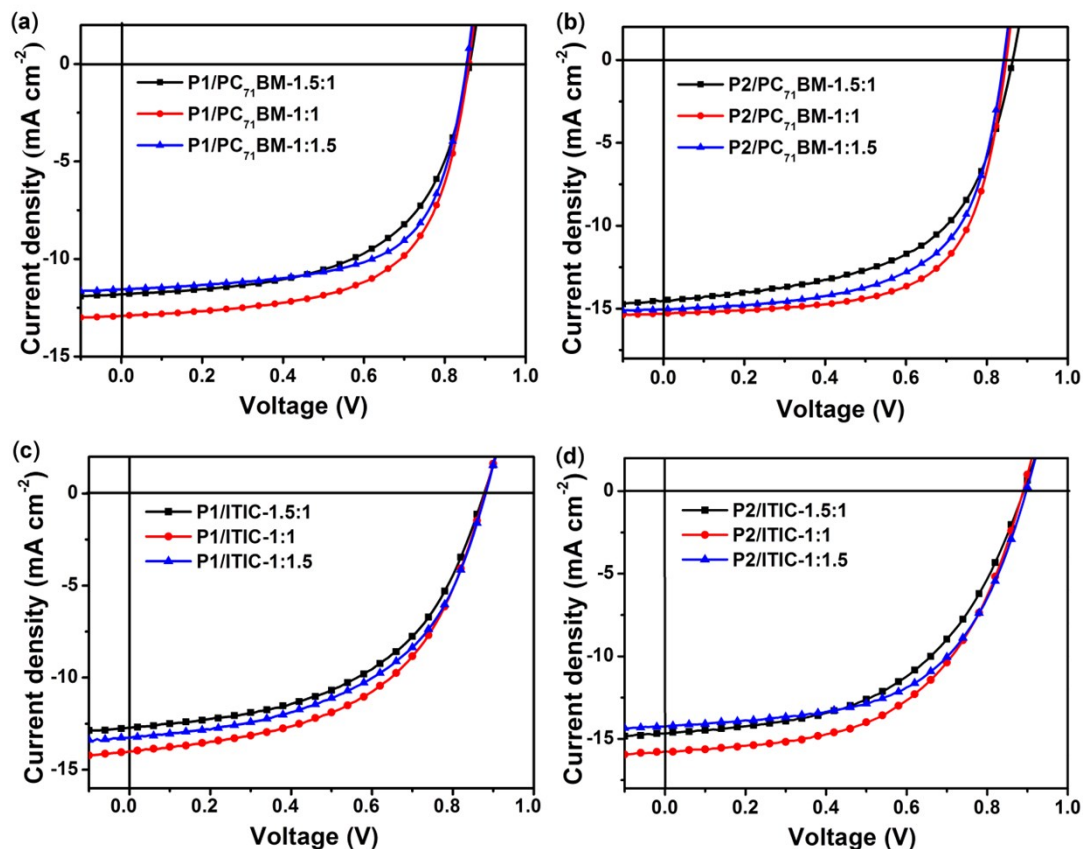

**Fig. S4** The  $J$ - $V$  curves of P1 and P2 based fullerene (a, b) and fullerene-free polymers solar cells (c, d) with different polymer/acceptor weight ratios.

## 7. Mobilities measurements

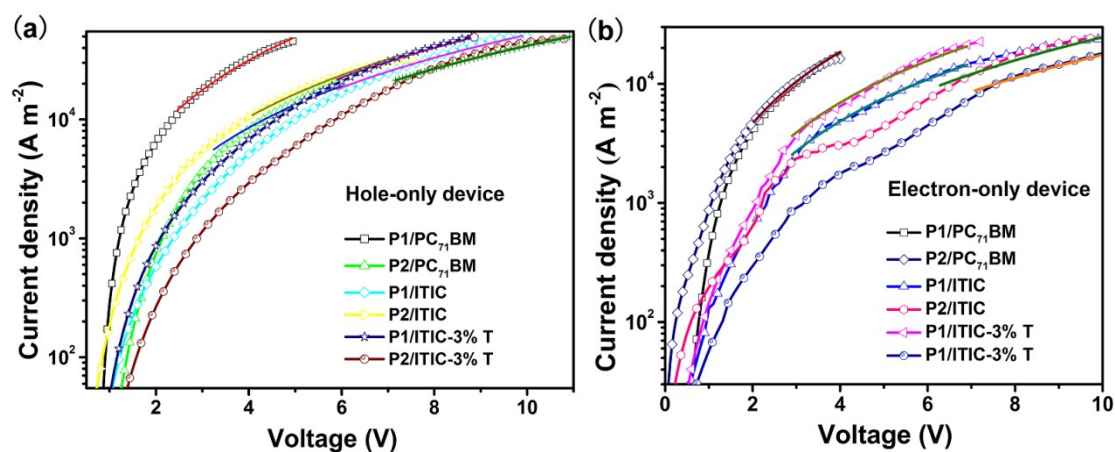

**Fig. S5** SCLC curves for polymer/acceptor based hole-only (a) and electron-only (b) devices

under optimal weight ratios.

## 8. Absorption spectra

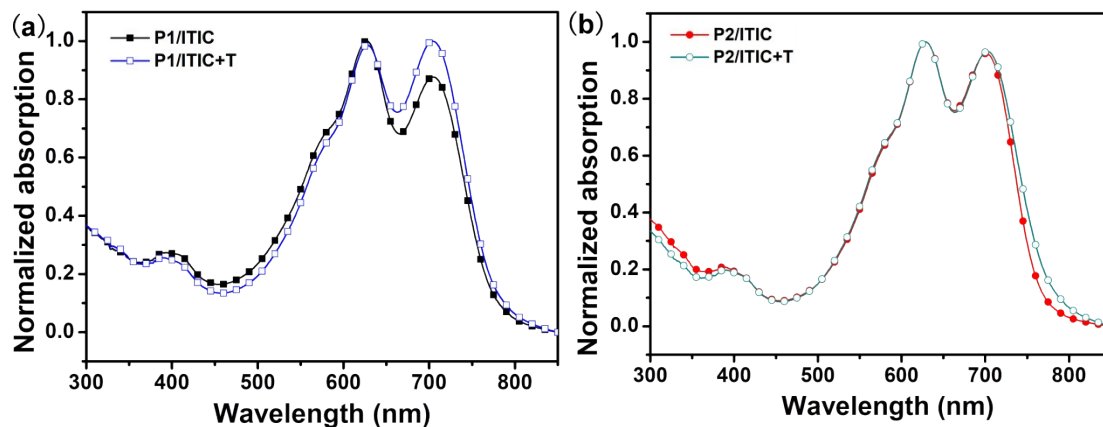

**Fig. S6** (a) Normalized absorption spectra of P1/ITIC blends ( $w/w=1:1$ ) with and without additive optimization; (b) normalized absorption spectra of P2/ITIC blends ( $w/w=1:1$ ) with and without additive optimization.

## 9. Morphology studies

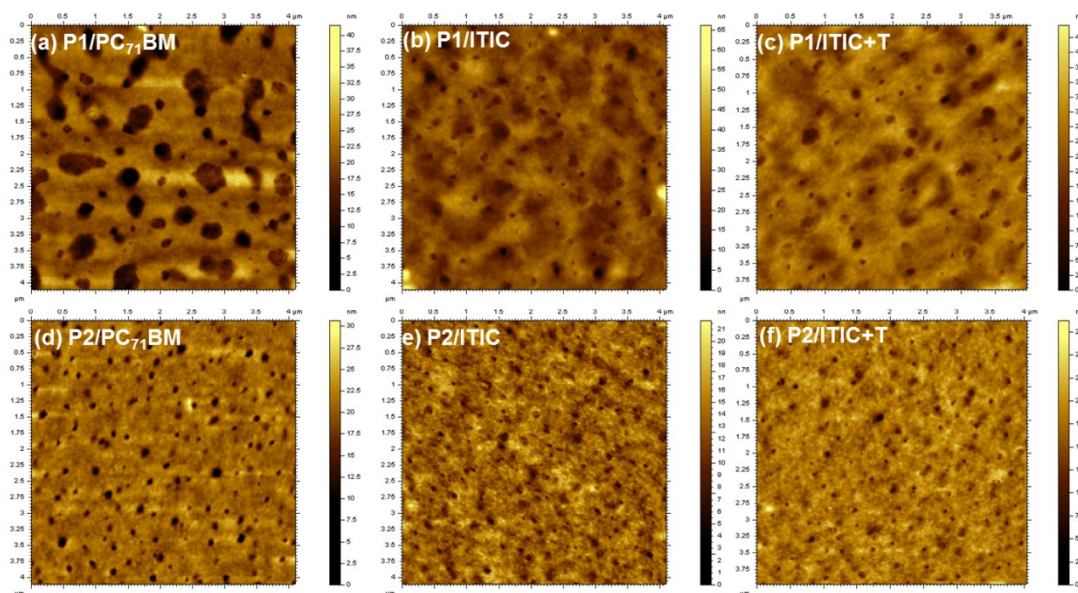

**Fig. S7** AFM topography images of different polymer/acceptor blend films under optimal weight ratios.
